# Supplementary material for: SARS-CoV-2 causes senescence in human cells and exacerbates the senescence-associated secretory phenotype through TLR-3
Source: publisher site journal article supplement (doi:10.18632/aging.203560), 2021-09-16
Supplement: Supplementary file [file aging-v13i18-203560-supplementary-material-SD1.pdf]

**SUPPLEMENTARY FIGURES**

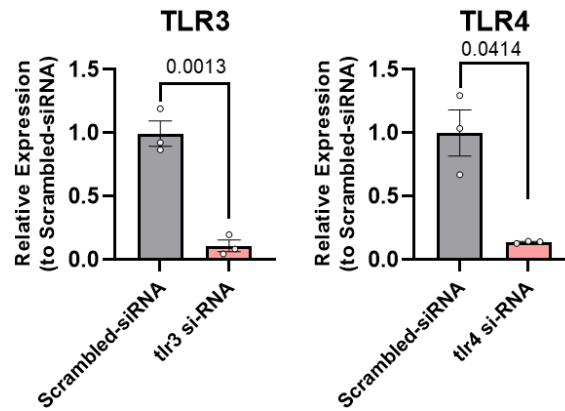

**Supplementary Figure 1. siRNA mediated knockdown of TLR-3 and TLR-4 in senescent preadipocytes.** Knockdown by siRNA was confirmed by rtPCR after 2 days in senescent preadipocytes (n=3). Data are expressed as a function of scrambled siRNA-treated senescent cells; mean +/- SEM, paired 2-tailed Student's t-tests.

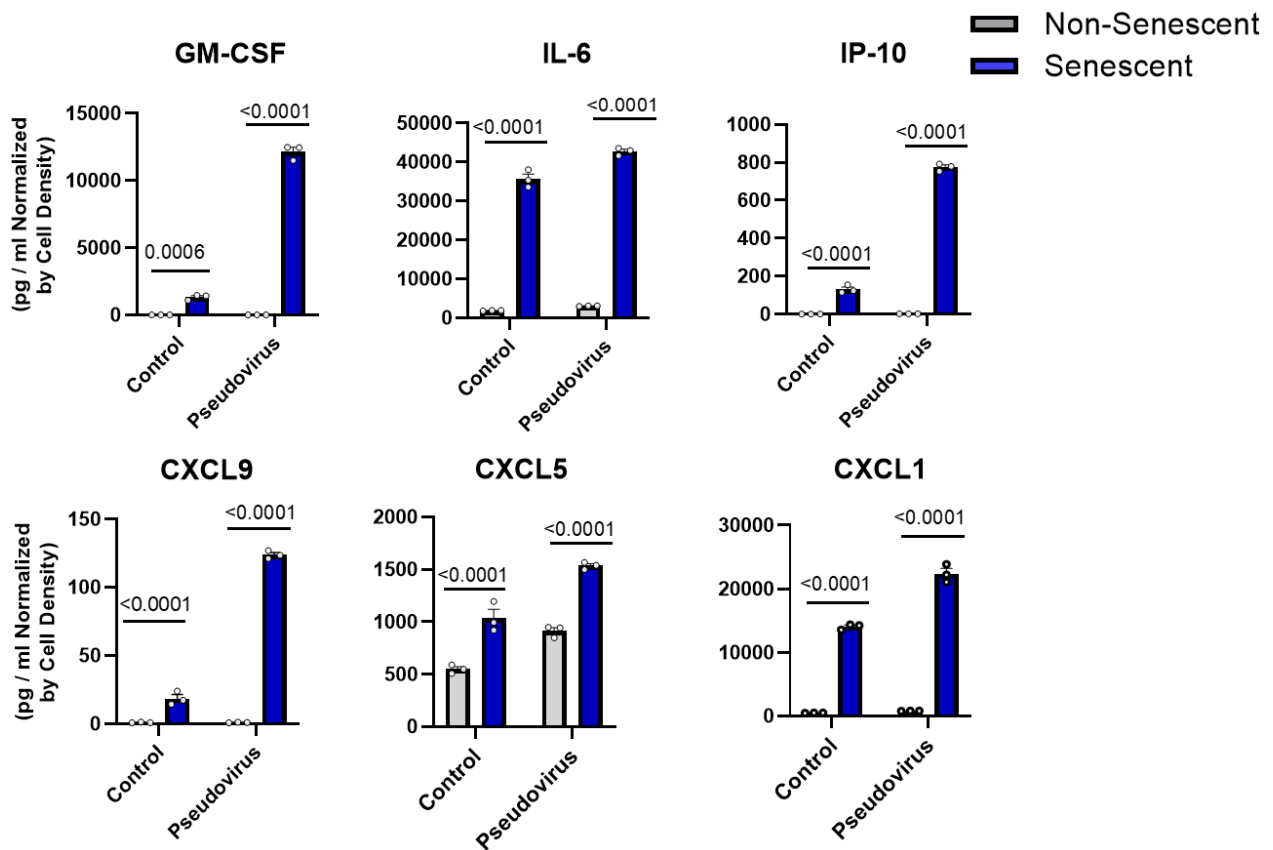

**Supplementary Figure 2. Pseudovirus amplifies the SASP in senescent kidney endothelial cells.** SASP factors were assayed in senescent and non-senescent kidney endothelial cells treated with pseudovirus for 96 hrs. Data are shown as a function of cell number; mean +/- SEM, 2-way ANOVA and *post hoc* comparison Fisher's LSD.
