# Supplementary material for: SARS-CoV-2 causes senescence in human cells and exacerbates the senescence-associated secretory phenotype through TLR-3
Source: publisher site journal article supplement (doi:10.18632/aging.203560), 2021-09-16
Supplement: Supplementary file [file aging-v13i18-203560-supplementary-material-SD2.pdf]

## SUPPLEMENTARY TABLES

**Supplementary Table 1. Significant p values in addition to those shown in Figures 3, 4.**

| Figures | Comparisons                                     | p values |
|---------|-------------------------------------------------|----------|
| 3 B     | IL-1 $\beta$ , TLR-3 antagonist vs. TLR-3 siRNA | 0.0114   |
|         | IP-10, TLR-3 antagonist vs. TLR-3 siRNA         | 0.0175   |
| 3 C     | Il-1 $\alpha$ senescent, 24 vs. 96 hrs.         | 0.0466   |
|         | Il-1 $\alpha$ , TLR-4 siRNA vs. control         | 0.0132   |
|         | IL-6, TLR-3 siRNA vs. control                   | 0.0450   |
| 4 B     | IL-6, TLR-4 siRNA vs. control                   | 0.0193   |
|         | IL-8, TLR-4 siRNA vs. control                   | 0.0065   |
|         | IP-10, TLR-4 siRNA vs. control                  | 0.0288   |

**Supplementary Table 2. Information about the control lung biopsy patients in Figure 5.**

| Gender | Cause of death                                                                                                 | Age |
|--------|----------------------------------------------------------------------------------------------------------------|-----|
| F      | Car accident                                                                                                   | 92  |
| F      | Car accident                                                                                                   | 100 |
| M      | Myocardial infarction (from atherosclerotic cardiovascular disease)                                            | 52  |
| M      | Drowning. Lungs without significant diagnostic abnormalities. No <i>rigor mortis</i> (death less than 24 hrs.) | 72  |
| M      | Cerebrovascular accident                                                                                       | 92  |
| M      | Dementia/malnutrition                                                                                          | 59  |

**Supplementary Table 3. Information about the COVID lung biopsy patients in Figure 5.**

| Gender | Cause of death/specified COVID complication                                                                                                                                                                           | Age |
|--------|-----------------------------------------------------------------------------------------------------------------------------------------------------------------------------------------------------------------------|-----|
| M      | Respiratory failure due to COVID                                                                                                                                                                                      | 71  |
| M      | Developed severe hypoxemia. Bronchoscopy did not reveal clear reversible cause                                                                                                                                        | 73  |
| M      | SARS-CoV-2 bronchopneumonia, lethargic, generalized muscle weakness, hypotension, and continued hallucinations                                                                                                        | 93  |
| F      | Aspiration pneumonia in the setting of a recent SARS-CoV-2 infection. The deceased began antibiotic therapy, however patient experienced significant decline in mentation and renal function                          | 89  |
| M      | Acute respiratory distress syndrome (ARDS). Family elected to have compassionate ventilator withdrawal                                                                                                                | 72  |
| F      | COVID-19 associated pneumonia in the setting of multiple chronic medical conditions and missed hemodialysis                                                                                                           | 71  |
| F      | COVID-19 infection requiring intubation, multiple strokes with residual left hemiparesis, diabetes mellitus type 2, coronary artery disease, essential hypertension, acute respiratory failure, and cognitive decline | 70  |
| M      | CT chest showed findings consistent with COVID infection with profound hypoxemia. Palliative care was consulted and patient transitioned to DNR                                                                       | 76  |
| M      | Multiple GI bleeds. Pneumothorax infections. Massive transfusion and death                                                                                                                                            | 51  |
